# Supplementary material
Source: PubMed Central journal article supplement (PMC3393389)
Supplement: supp_56.7.3739_FigS1.pdf [file supp_56.7.3739_FigS1.pdf]

FIG. S1 : Synthetic route used for HDQ synthesis, based on the method of Woschek et al. (1)

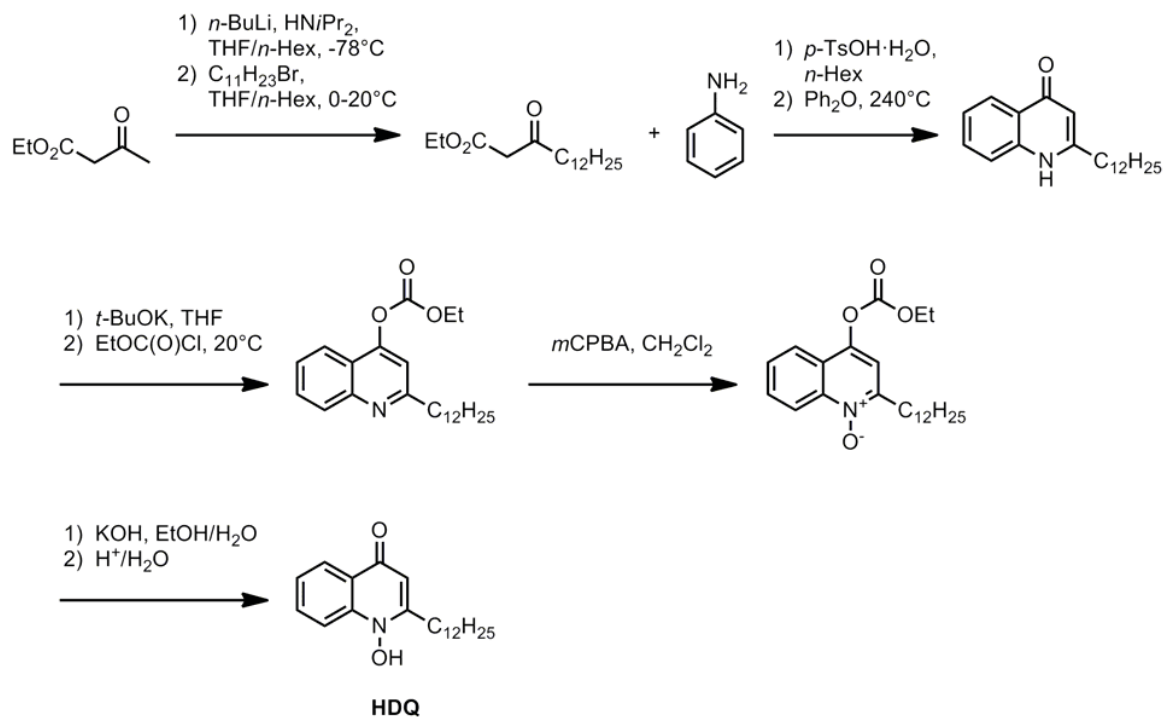

(1) **Woschek, A., M. Mahout, K. Mereiter, and F. Hammerschmidt.** 2007. Synthesis of 2-Heptyl-1-hydroxy-4(1H)-quinolone - Unexpected Rearrangement of 4-(Alkoxy-carbonyloxy)quinoline N-Oxides to 1-(Alkoxy-carbonyl-oxy)-4(1H)-quinolones. *Synthesis-Stuttgart* **10**:1517-1522.
