# Supplementary material
Source: PubMed Central journal article supplement (PMC3393389)
Supplement: supp_56.7.3739_TableS1.pdf [file supp_56.7.3739_TableS1.pdf]

|                        | Q <sub>o</sub>      |                    | Q <sub>i</sub>     |                    |                    |
|------------------------|---------------------|--------------------|--------------------|--------------------|--------------------|
|                        | SMA                 | HDQ                | SMA                | HDQ                | Ubiquinone         |
| <b>GOLDScore Range</b> | 72.9-111.6          | 61.3-65.3          | 23.2-60.0          | 50.0-59.4          | 46.8-50.4          |
| <b>Average</b>         | <b>92.29</b>        | <b>63.49</b>       | <b>45.35</b>       | <b>54.06</b>       | <b>48.27</b>       |
| <b>SD</b>              | 13.84               | 1.26               | 12.97              | 3.50               | 1.34               |
| <b>ChemScore Range</b> | 47.8-57.7           | 35.8-39.3          | 18.7-33.3          | 23.3-30.7          | 14.5-25.4          |
| <b>Average</b>         | 53.97               | 37.71              | 28.03              | 28.63              | 22.24              |
| <b>SD</b>              | 3.38                | 1.22               | 4.705              | 2.08               | 3.81               |
| <b>Best solution</b>   | GS=111.6<br>CS=57.2 | GS=65.3<br>CS=35.8 | GS=56.3<br>CS=33.3 | GS=59.4<br>CS=29.8 | GS=50.4<br>CS=25.0 |

**Table S1.** GoldScore results and associated data for the *in silico* docking of stigmatellin (SMA), HDQ and ubiquinone-6 at the Q<sub>o</sub>- and Q<sub>i</sub> sites of yeast *bc*<sub>1</sub> (3CX5.pdb). Dockings were performed with GOLD 5.0.1 as described in Materials and Methods.
